# Supplementary material for: Non-Invasive Label-free Analysis Pipeline for In Situ Characterization of Differentiation in 3D Brain Organoid Models
Source: Research Square preprint supplement (doi:10.21203/rs.3.rs-4049577/v1), 2024-04-01
Supplement: Supplementary file 1 [file c37fdd655e9ec167f15aead4.pdf]

# Supplemental Material

**Table S1.** Summary of device configurations evaluated for qOBM imaging.

| Platform                 | Width of Well, mm | Bottom Layer Height, mm | Device Volume (V) |
|--------------------------|-------------------|-------------------------|-------------------|
| Device (Configuration 1) | 5                 | 5                       | ~1 mL             |
| Device (Configuration 2) | 5                 | 2.5                     | ~0.5 mL           |
| Device (Configuration 3) | 5                 | 1                       | ~0.2 mL           |
| Device (Configuration 4) | 8                 | 2.5                     | ~1 mL             |
| Device (Configuration 5) | 12                | 1                       | ~1 mL             |

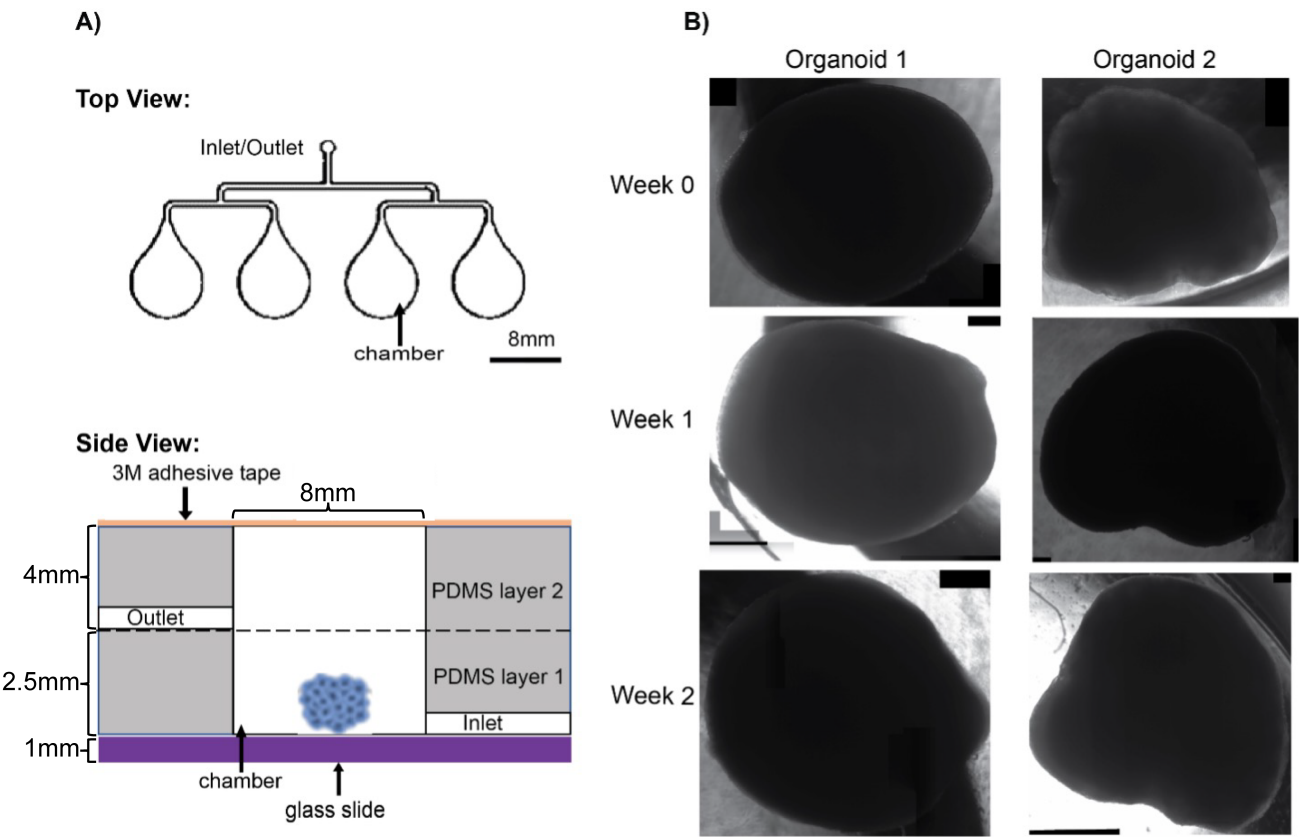

**Figure S1.** Device modifications allow for organoid growth and in situ qOBM monitoring. (A) Schematic of the top view of the customized microfluidic device showing design features. Scale bar: 8mm. Side view of microfluidic device setup. Two PDMS layers are bonded together and then to a glass slide. Post organoid loading, the devices are sealed with adhesive tape. (C) brightfield images of organoids cultured in customized microfluidic devices. Scale bar: 500 $\mu$ m.
